# Supplementary material
Source: PubMed Central journal article supplement (PMC7089034)
Supplement: 11427_2015_4903_MOESM1_ESM.pdf [file 11427_2015_4903_MOESM1_ESM.pdf]

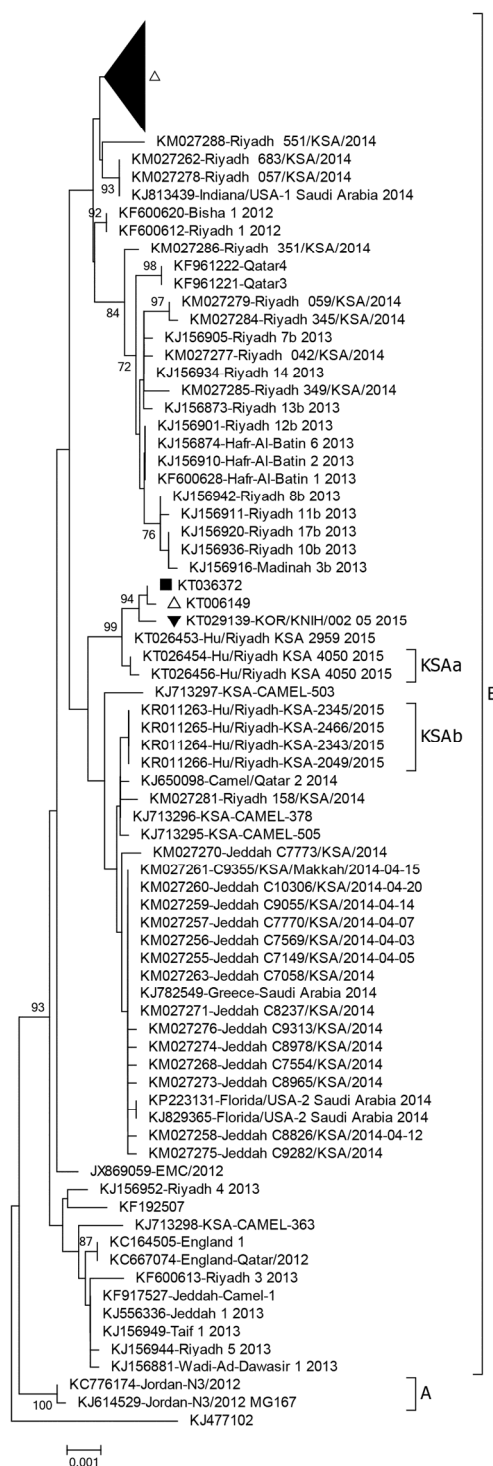

**Figure S1** Phylogenetic tree of *S* gene of MERS CoV built with Neighbor Joining method using MEGA6.0 and tested with 1,000 bootstrap replicates. 50 strains with high similarity isolated from Saudi Arabia and United Arab Emirates in 2013–2014 were compressed in the phylogenetic tree of *S* gene.

**Table S1** The differences between three MERS CoVs

|          | Site (No.nt) |      |      |      |       |       |       |       |       |       |       |       |
|----------|--------------|------|------|------|-------|-------|-------|-------|-------|-------|-------|-------|
|          | 5632         | 5982 | 6142 | 8851 | 18931 | 21494 | 21720 | 22899 | 23159 | 24239 | 25824 | 25965 |
| KT036372 | T            | G    | T    | G    | A     | C     | A     | G     | C     | T     | A     | C     |
| KT006149 | C            | C    | T    | T    | A     | G     | A     | G     | C     | T     | A     | C     |
| KT029139 | C            | G    | G    | G    | G     | C     | C     | C     | T     | C     | T     | T     |

The number of sites is based on the sequence of KT036372.
